# Supplementary material for: CRISPR/Cas9-Mediated Gene Disruption Reveals the Importance of Zinc Metabolism for Fitness of the Dimorphic Fungal Pathogen Blastomyces dermatitidis
Source: PubMed Central journal article supplement (PMC5885028; doi:10.1128/mbio.00412-18), 2018-04-03
Supplement: mbo002183801st2.pdf [file mbo002183801st2.pdf]

**Table S2: Primers used for plasmid construction and qPCR**

| Primer name                       | Sequence (5' - 3') <sup>1</sup>                             | Target <sup>2</sup>                  | Purpose <sup>3</sup>                              |
|-----------------------------------|-------------------------------------------------------------|--------------------------------------|---------------------------------------------------|
| tdsP984                           | gtcaaacactgatagtttCTTGGTGATGCTAAAGGG                        | pFC332                               | GA: pPTS608-Cas9-hyg; amplify Cas9 & hyg backbone |
| tdsP985                           | attgtggtgtaaacattaatGTGTGCGCCCTTATTCGAC                     | pFC332                               | GA: pPTS608-Cas9-hyg; amplify Cas9 & hyg backbone |
| tdsP986, FragA F (common)         | ccgctgagggtttaatCGTAAAGCTCCCTAATTG                          | pFC334 or pPTS608-Cas9 sgRNA vectors | GA: CRISPR targeting constructs                   |
| tdsP989, FragB R (common)         | cggctgaggctttaatGAGCCAAGAGCGGATTCC                          | pFC334 or pPTS608-Cas9 sgRNA vectors | GA: CRISPR targeting constructs                   |
| tdsP991, FragA R (Pra1)           | GACGAGCTTACTCGTTTCGTCTCACGGACTCATCAGCTGGGCGGTGATGTCTGCTCAAG | pFC334 or pPTS608-Cas9 sgRNA vectors | GA: pPTS608-Cas9-hyg-Pra1 sgRNA                   |
| tdsP992, FragB F (Pra1)           | GAAACGAGTAAGCTCGTCTGCTGGTCCCAATCTGCATGGTTTLAGAGCTAGAAATAGC  | pFC334 or pPTS608-Cas9 sgRNA vectors | GA: pPTS608-Cas9-hyg-Pra1 sgRNA                   |
| gckP001, PRA1 F                   | TCACCATGAGGCTCCCCATA                                        | <i>B. d. PRA1</i> (BDFG 05357)       | Screening & sequencing targeted strains           |
| gckP002, PRA1 R                   | GCCATACCAGAGCACATGGT                                        | <i>B. d. PRA1</i> (BDFG 05357)       | Screening & sequencing targeted strains           |
| gckP011, PRA1 F                   | GACTATCCCATCCACAAC                                          | <i>B. d. PRA1</i> (BDFG 05357)       | qPCR                                              |
| gckP012, PRA1 R                   | TACAGAGCGGAATCTTTG                                          | <i>B. d. PRA1</i> (BDFG 05357)       | qPCR                                              |
| gckP015, Cas9 F                   | GAGCATGCCGAAGTCAATA                                         | Cas9 (pPTS608-Cas9-hyg)              | qPCR                                              |
| gckP016, Cas9 R                   | CCCAATCCTTCTTTGAGCG                                         | Cas9 (pPTS608-Cas9-hyg)              | qPCR                                              |
| gckP021, GAPDH F                  | ACCCCCGCTCCTCCATCTTC                                        | <i>B. g. GAPDH</i> (BDBG 07959)      | qPCR                                              |
| gckP022, GAPDH R                  | GAGTAGCCCCACTCGTTGTCATACC                                   | <i>B. g. GAPDH</i> (BDBG 07959)      | qPCR                                              |
| gckP025, RPL34 F                  | AAAGTCCGCATCATCAAGAC                                        | <i>B. g. RPL34</i> (BDBG 01400)      | qPCR                                              |
| gckP026, RPL34 R                  | GAACGCCTGGGAGTTTG                                           | <i>B. g. RPL34</i> (BDBG 01400)      | qPCR                                              |
| gckP027, FragA R (Zrt1 #1)        | GACGAGCTTACTCGTTTCGTCTCACGGACTCATCAGATAGCACGGTGTCTGCTCAAG   | pFC334 or pPTS608-Cas9 sgRNA vectors | GA: pPTS608-Cas9-neo-Zrt1.1 sgRNA                 |
| gckP028, FragB F (Zrt1 #1)        | GAAACGAGTAAGCTCGTCTATAGCAAGGCAATACGTAGGGTTTTAGAGCTAGAAATAGC | pFC334 or pPTS608-Cas9 sgRNA vectors | GA: pPTS608-Cas9-neo-Zrt1.1 sgRNA                 |
| gckP029, FragA R (Zrt1 #2)        | GACGAGCTTACTCGTTTCGTCTCACGGACTCATCAGCATGGTGGTGTCTGCTCAAG    | pFC334 or pPTS608-Cas9 sgRNA vectors | GA: pPTS608-Cas9-neo-Zrt1.2 sgRNA                 |
| gckP030, FragB F (Zrt1 #2)        | GAAACGAGTAAGCTCGTCCATGGTATGGCAGTCGGAGTTTTAGAGCTAGAAATAGC    | pFC334 or pPTS608-Cas9 sgRNA vectors | GA: pPTS608-Cas9-neo-Zrt1.2 sgRNA                 |
| gckP034, F                        | gcggaacataactgggcccgggaagatctGCGTAAGCTCCCTAATTGG            | pPTS608-Cas9-hyg-Zrt1 sgRNA #1       | GA: pPTS608-Cas9-hyg-2X-Pra1-Zrt1 #1 sgRNAs       |
| gckP035, R                        | tcagcggaaacagctatgacctgagatctGAGCCAAGAGCGGATTCC             | pPTS608-Cas9-hyg-Zrt1 sgRNA #1       | GA: pPTS608-Cas9-hyg-2X-Pra1-Zrt1 #1 sgRNAs       |
| gckP042, F                        | ACAATCAGCCGTGTTTGTGA                                        | <i>B. d. BLENG2</i> (BDFG 08749)     | Screening & sequencing targeted strains           |
| gckP043, R                        | ATTCCTTCTGCGCATCCTTT                                        | <i>B. d. BLENG2</i> (BDFG 08749)     | Screening & sequencing targeted strains           |
| gckP044, FragA R (mCherry v1, v2) | GACGAGCTTACTCGTTTCGTCTCACGGACTCATCAGCGCTTCGGTGTCTGCTCAAG    | pFC334 or pPTS608-Cas9 sgRNA vectors | GA: pPTS608-Cas9-hyg-mCherry sgRNA                |
| gckP045, FragB F (mCherry v1)     | GAAACGAGTAAGCTCGTCCGCTTCAAGGTGCGATGGGTTTTAGAGCTAGAAATAGC    | pFC334 or pPTS608-Cas9 sgRNA vectors | GA: pPTS608-Cas9-hyg-mCherry sgRNA                |
| gckP048, PgpA-Pra1_sgRNA F        | tagctgtttccgctgagggtttaattaaGCGTAAGCTCCCTAATTGGC            | pPTS608-Cas9-hyg-Pra1 sgRNA          | GA: pPTS608-Cas9-hyg-2XSP-Pra1-Zrt1 #1 sgRNAs     |
| gckP049, PgpA-Pra1_sgRNA R        | gcactctcaatgtacaagGTCCATTCCGATGCCG                          | pPTS608-Cas9-hyg-Pra1 sgRNA          | GA: pPTS608-Cas9-hyg-2XSP-Pra1-Zrt1 #1 sgRNAs     |
| gckP050, Zrt1.1_sgRNA F           | tggcgaatgggacctgtacattgagagTGCTATCTGATGAGTCCGTGAG           | pPTS608-Cas9-hyg-Zrt1 sgRNA #1       | GA: pPTS608-Cas9-hyg-2XSP-Pra1-Zrt1 #1 sgRNAs     |
| gckP053, TtrpC R                  | attctgctgtctcgctgaggctttaattaaGAGCCAAGAGCGGATTCC            | pPTS608-Cas9-hyg-Zrt1 sgRNA #1       | GA: pPTS608-Cas9-hyg-2XSP-Pra1-Zrt1 #1 sgRNAs     |
| gckP062, ZRT1 F                   | TATACCTCTATCCAAGTCCAACTA                                    | <i>B. d. ZRT1</i> (BDFG 09159)       | Screening & sequencing targeted strains           |
| gckP064, ZRT1 R                   | CTCCTATGCAAAATCTAGATGGAA                                    | <i>B. d. ZRT1</i> (BDFG 09159)       | Screening & sequencing targeted strains           |
| gckP065, mCherry F                | GGAATAAGTGGTGCAACAAGC                                       | Bad1 TRΔ20 Eα mCherry T85-14.5 gDNA  | Screening & sequencing targeted strains           |
| gckP068, mCherry R                | CAGCTTCACCTTGATGAACTC                                       | Bad1 TRΔ20 Eα mCherry T85-14.5 gDNA  | Screening & sequencing targeted strains           |

| Primer name                   | Sequence (5' - 3') <sup>1</sup>                                | Target <sup>2</sup>                  | Purpose <sup>3</sup>                  |
|-------------------------------|----------------------------------------------------------------|--------------------------------------|---------------------------------------|
| gckP069, FragB F (mCherry v2) | GAAACGAGTAAGCTCGTCGCGCTTCAAGGTGCACATGGGTTTTAGAGCTAGAAATAGC     | pFC334 or pPTS608-Cas9 sgRNA vectors | GA: pPTS608-Cas9-hyg-mCherry sgRNA #2 |
| gckP070, FragA R (mCherry v3) | GACGAGCTTACTCGTTTTCGTCCTCACGGACTCATCAGGCGCATCGGTGATGTCTGCTCAAG | pFC334 or pPTS608-Cas9 sgRNA vectors | GA: pPTS608-Cas9-hyg-mCherry sgRNA #3 |
| gckP071, FragB F (mCherry v3) | GAAACGAGTAAGCTCGTCGCGCATGAACTCCTTGATGAGTTTTAGAGCTAGAAATAGC     | pFC334 or pPTS608-Cas9 sgRNA vectors | GA: pPTS608-Cas9-hyg-mCherry sgRNA #3 |
| P1 FragA R (BI-Eng2 #1)       | GACGAGCTTACTCGTTTTCGTCCTCACGGACTCATCAGAGTACTCGGTGATGTCTGCTCAAG | pFC334 or pPTS608-Cas9 sgRNA vectors | GA: pPTS608-Cas9-hyg-BIEng2 sgRNA #1  |
| P2 FragB F (BI-Eng2 #1)       | GAAACGAGTAAGCTCGTCAGTACTCAGCTTGGCTAGAGTTTTAGAGCTAGAAATAGC      | pFC334 or pPTS608-Cas9 sgRNA vectors | GA: pPTS608-Cas9-hyg-BIEng2 sgRNA #1  |
| P3 FragA R (BI-Eng2 #2)       | GACGAGCTTACTCGTTTTCGTCCTCACGGACTCATCAGGAAGTCCGGTGTCTGCTCAAG    | pFC334 or pPTS608-Cas9 sgRNA vectors | GA: pPTS608-Cas9-hyg-BIEng2 sgRNA #2  |
| P4 FragB F (BI-Eng2 #2)       | GAAACGAGTAAGCTCGTCGAAGTCGTCAAGAAGTTCGGTTTTAGAGCTAGAAATAGC      | pFC334 or pPTS608-Cas9 sgRNA vectors | GA: pPTS608-Cas9-hyg-BIEng2 sgRNA #2  |

<sup>1</sup>Color coding for Gibson Assembly Frag A & B primers: Hammerhead (HH) ribozyme, HH IR or IR' in protospacer, protospacer, sgRNA backbone, gpd promoter, trpC terminator

<sup>2</sup>B.g., *Blastomyces gilchristii*; B.d., *Blastomyces dermatitidis*

<sup>3</sup>GA: Gibson Assembly
